# Supplementary material
Source: PubMed Central journal article supplement (PMC9806560)
Supplement: kiac505_supplementary_data.pdf [file kiac505_supplementary_data.pdf]

A

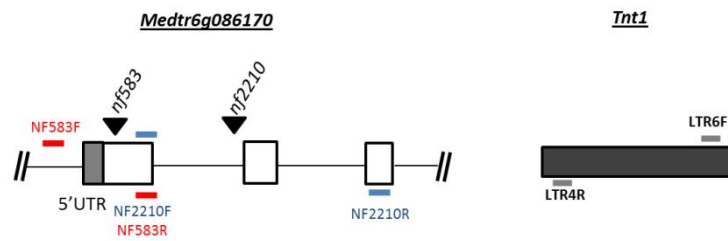

B

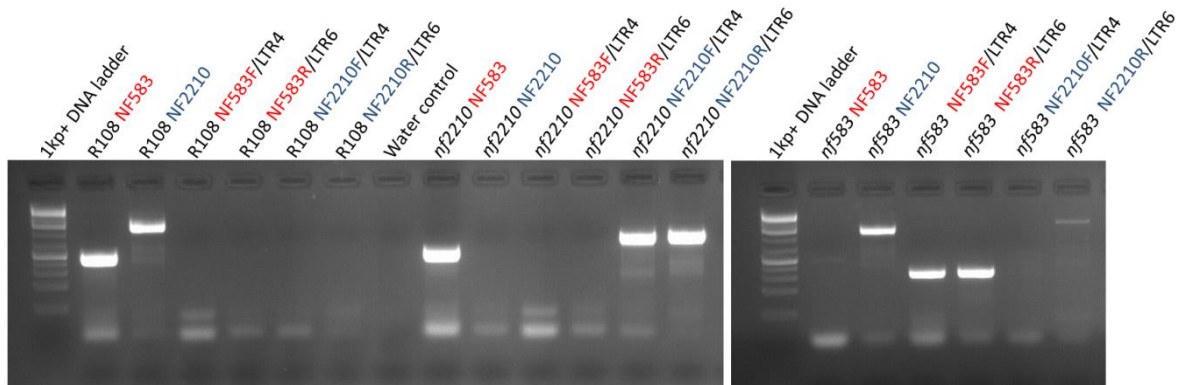

### Supplemental Figure S1. PCR genotyping of the *Tnt1* insertion in *nf583* and *nf2210*

(A) Location of the primers used for the genotyping of *Medtr6g086170* and *Tnt1* sequences.  
(B) PCR products generated in WT (R108), *nf583*, *nf2210* using different combination of primers. The primers colored in blue and red are respectively used for the genotyping of the *Tnt1* insertion in *nf2210* and *nf583* background. The primers colored in grey recognize the *Tnt1* sequence.

**A**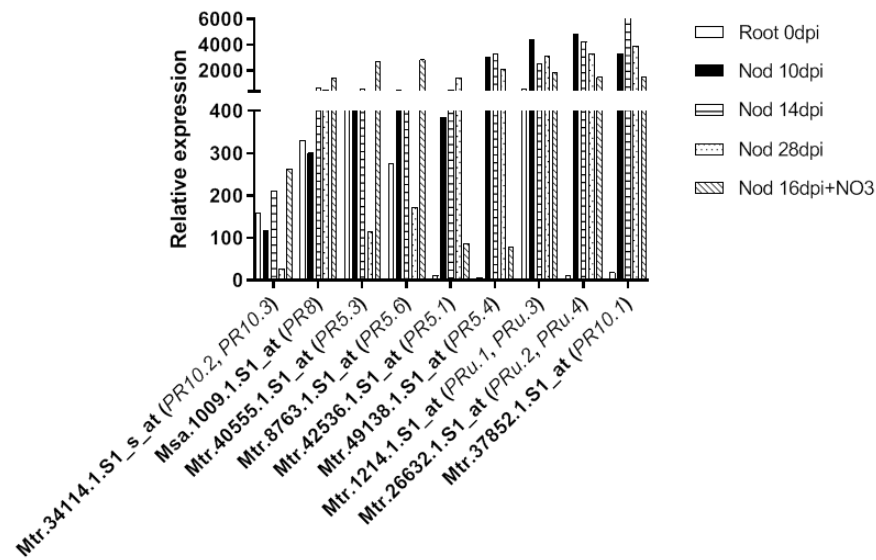**B**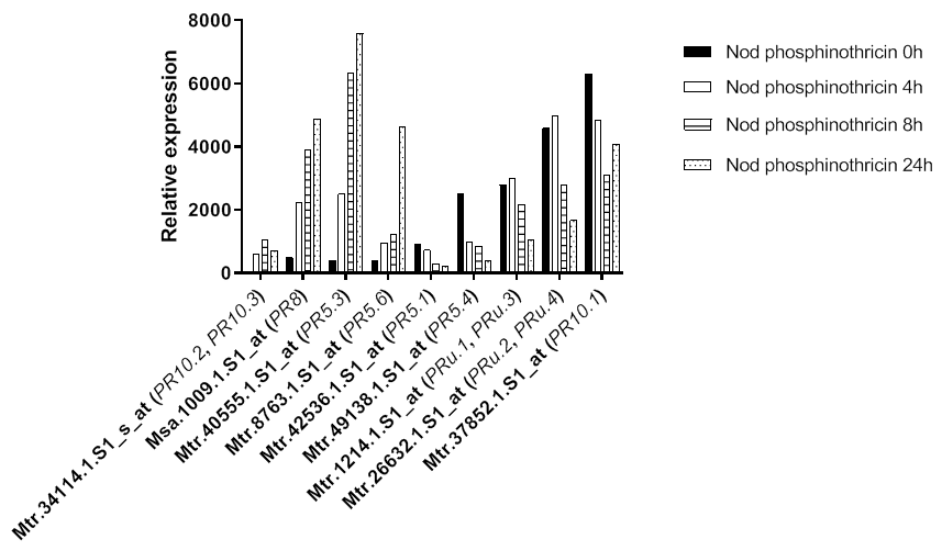

**Supplemental Figure S2. Expression patterns of *PR* candidate genes in wild-type nodules in response to nitrate and phosphinothricin.**

(A) Expression patterns of *PR* candidate genes for defense studies in *Medicago* roots (0-dpi (day post-inoculation) or nodules (10, 14 or 28-dpi) inoculated with *S. meliloti* or in 16-dpi nodules treated with nitrate (KNO<sub>3</sub>, Benedito et al., 2008). (B) Expression of *PR* candidates in nodules of plants at 0, 4, 8 and 24 h after treatment with inhibitor of glutamine synthase, the phosphinothricin [0.25 mM] (Seabra et al., 2012). Expression profiles are based on data available on the *MtGEA* database (<https://medicago.toulouse.inrae.fr/MtExpress>, Noble Research Institute). Relative expression corresponds to mean signal of cDNA hybridization on the microarray for three independent experiments.

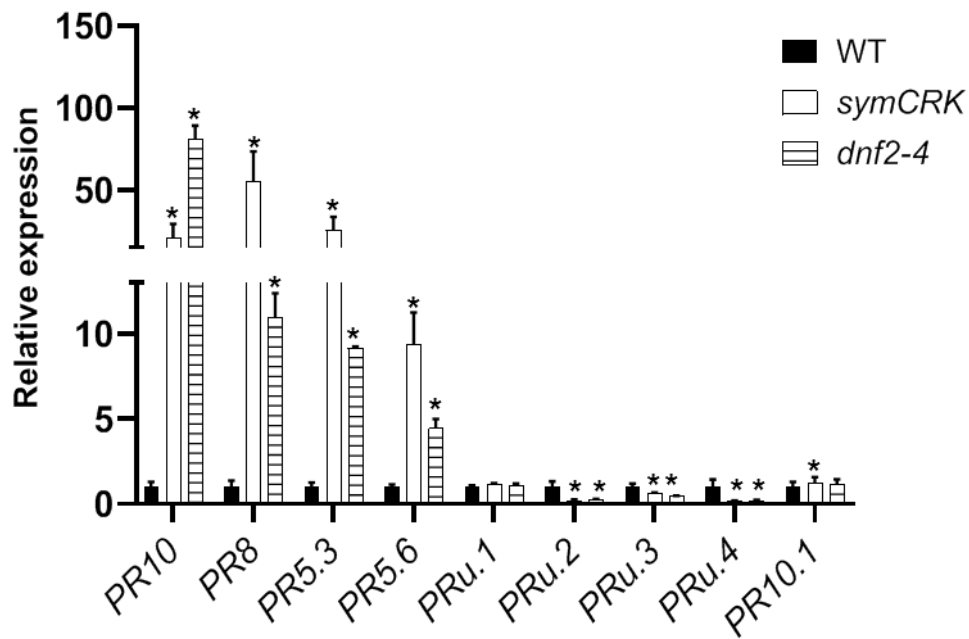

**Supplemental Figure S3. Validation by RT-qPCR analysis of 10 *PR* genes selected for defense monitoring in the *Medicago* nodules.**

Expression analysis in WT, *symCRK* and *dnf2-4* was done on 21-dpi (day post-inoculation) nodules from plants cultivated *in vitro*. *PRu*: unclassified in a *PR* group. Error bars show the standard error (SE) and the asterisks represent significant variation (p-value < 2.5%) compared to the WT using Man & Whitney statistical test. The RT-qPCR analyses were made on plants from three biological repetitions (16 plants per repetition) with two technical replicates.

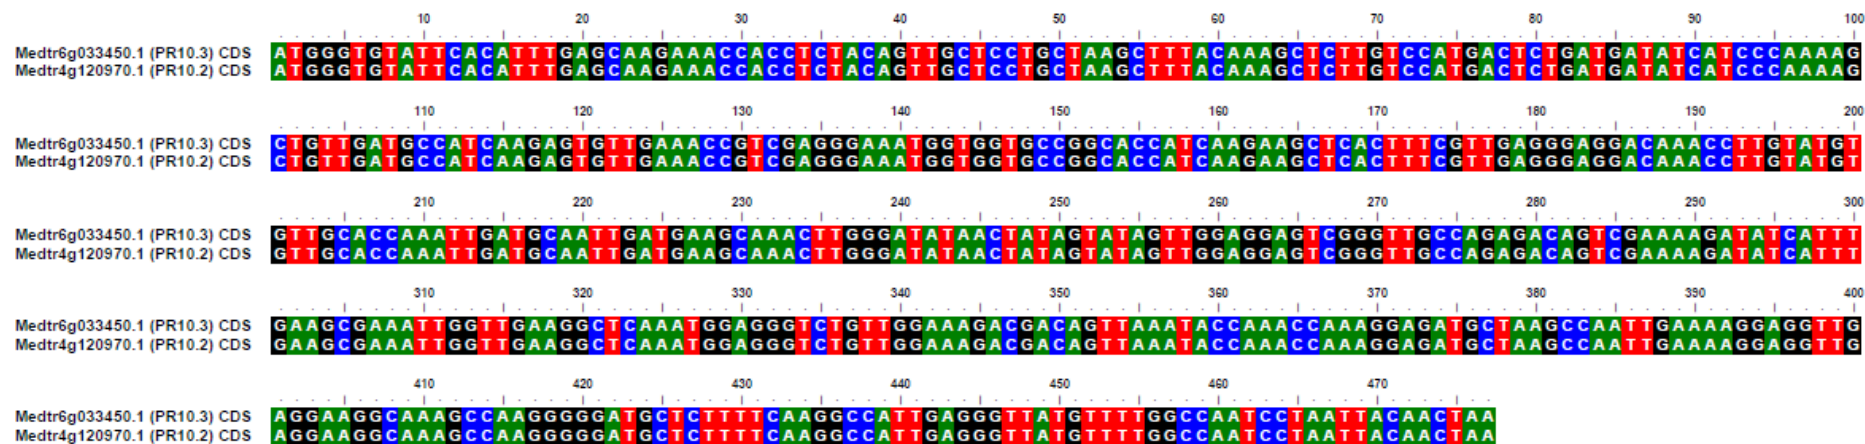

**Supplemental Figure S4. Comparison of CDS sequences between *PR10.2* (*Medtr4g120970.1*) and *PR10.3* (*Medtr6g033450.1*).**

Sequence alignment was realized using ClustalW method on Bioedit tool (<https://bioedit.software.informer.com>).

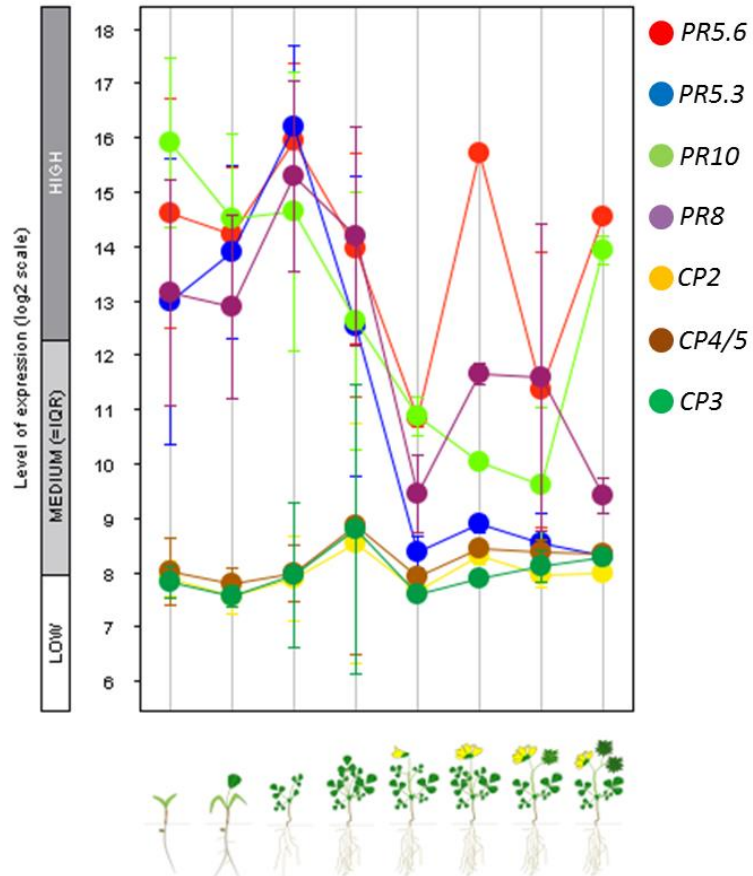

**Supplemental Figure S5. Expression analyses of *PRs* and *CPs* during the development of *Medicago*.**

The results show log<sub>2</sub> of the expression level in eight developmental stages. The results were generated using the Genevestigator database (<https://genevestigator.com/>). Error bars show the SE of three independent experiments.

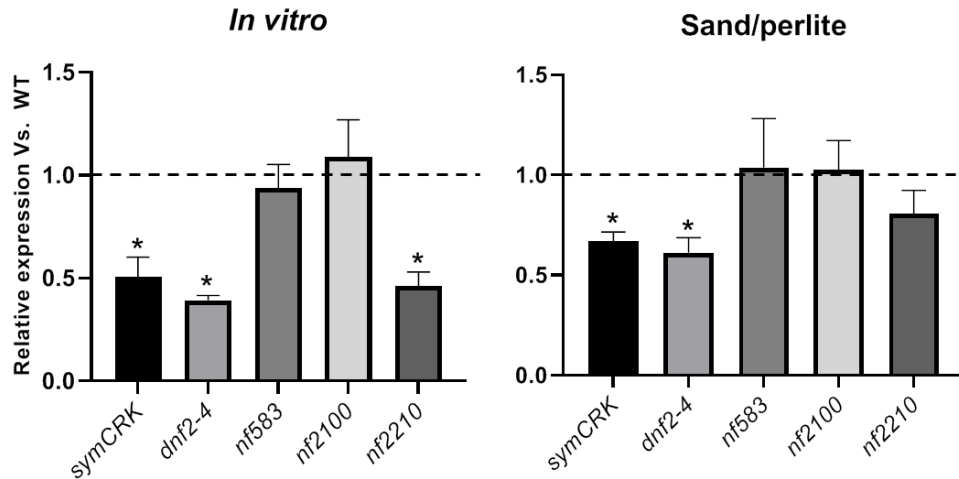

**Supplemental Figure S6. Expression pattern of *PHYCYST5* in *Medicago* fix- nodules of mutants in response to different environmental conditions.**

Expression analysis of the *PHYCYST5* in fix- nodules mutants cultivated *in vitro* and in sand/perlite. The expression was measured using RT-qPCR and the results show mean variation in mutants compared to the WT. The RT-qPCR analyses were made on plants from three biological repetitions (16 plants per repetition) with two technical replicates. Error bars show the SE and the asterisks represent significant variation (p-value < 2.5%) compared to the WT using Man & Whitney statistical test. The dotted lines represent the expression level of the WT.

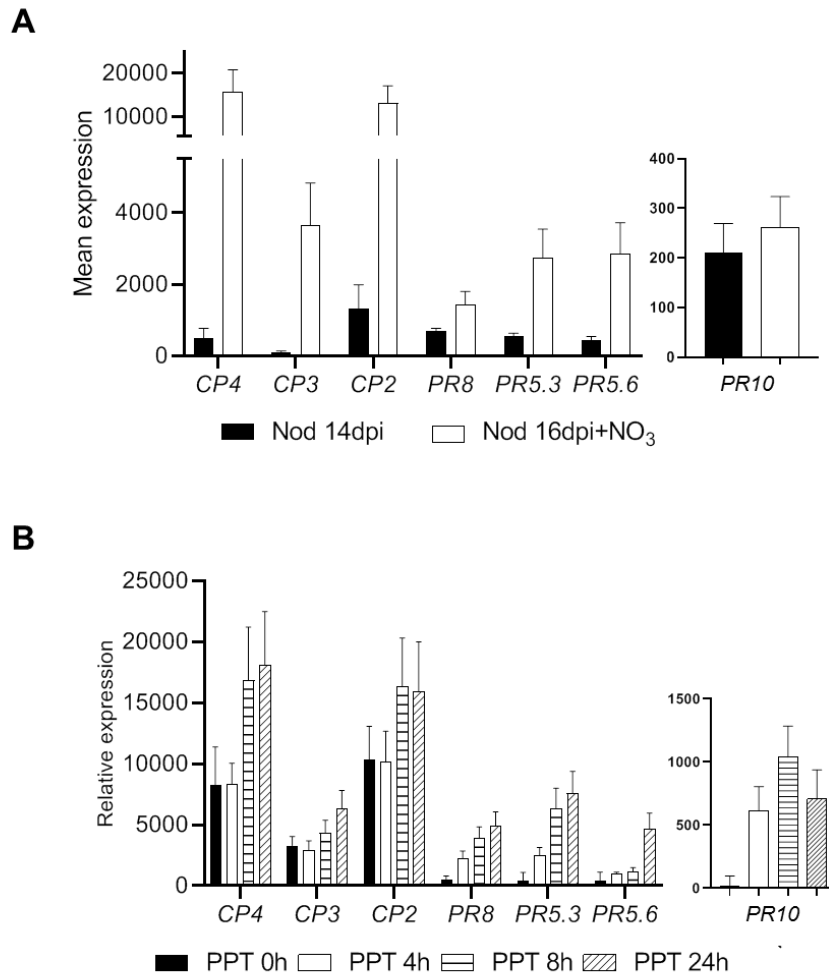

**Supplemental Figure S7. Expression pattern of senescence and defense markers in Medicago wild-type nodules in response to nitrate and phosphinothricin treatments.**

Expression pattern of senescence (*CP4*, *CP3* and *CP2*) and defense (*PR8*, *PR10*, *PR5.3* and *PR5.6*) markers in untreated (14-dpi) or treated (16-dpi) nodules with nitrate (A, Benedito et al., 2008) or nodules from plants incubated 0, 4, 8, 24h with the inhibitor of glutamine synthase, the phosphinothricin at [0.25 mM] (B, Seabra et al., 2012). Error bars represent SE of three independent experiments. Expression data are provided by *MtGEA* database (<https://medicago.toulouse.inrae.fr/MtExpress>, Noble Research Institute). Relative expression corresponds to mean signal of cDNA hybridization on the microarray.

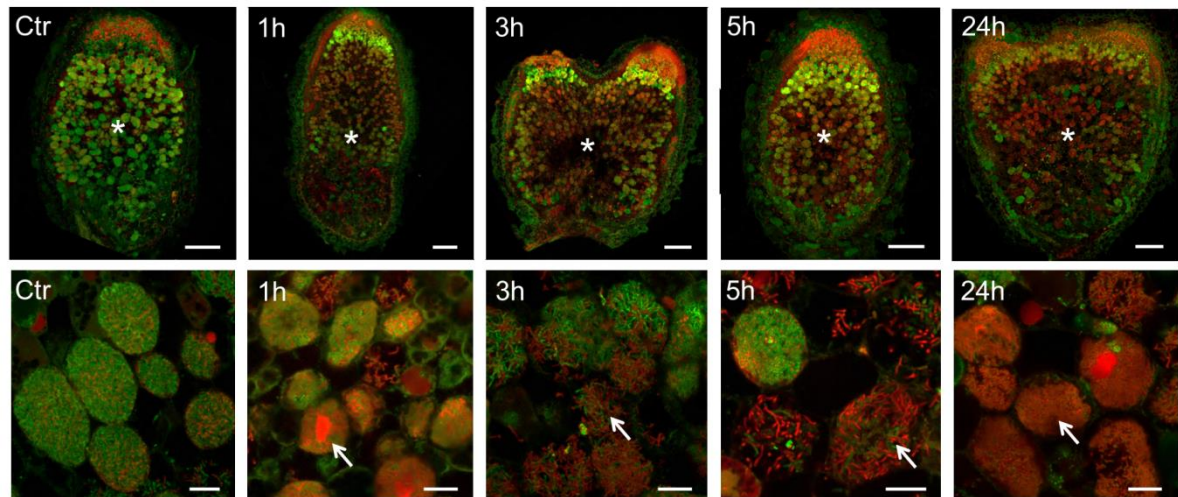

**Supplemental Figure S8. Live and dead staining of wild-type inoculated nodules separated from the roots.**

Live and dead staining of 21-dpi nodule sections obtained from the WT inoculated with *S. medicae* WSM419. The nodules were separated from the root and incubated 0 (Ctr), 1, 3, 5 and 24h. Top panel displays the nodule sections (scale bars = 200  $\mu$ m) and bottom panel shows the bacteroids in the fixation zone III (scale bars = 20  $\mu$ m). Asterisk indicates the zone III and the arrows show dead bacteroids. This figure shows the complete image panel corresponding to the experiment of the figure 5D.



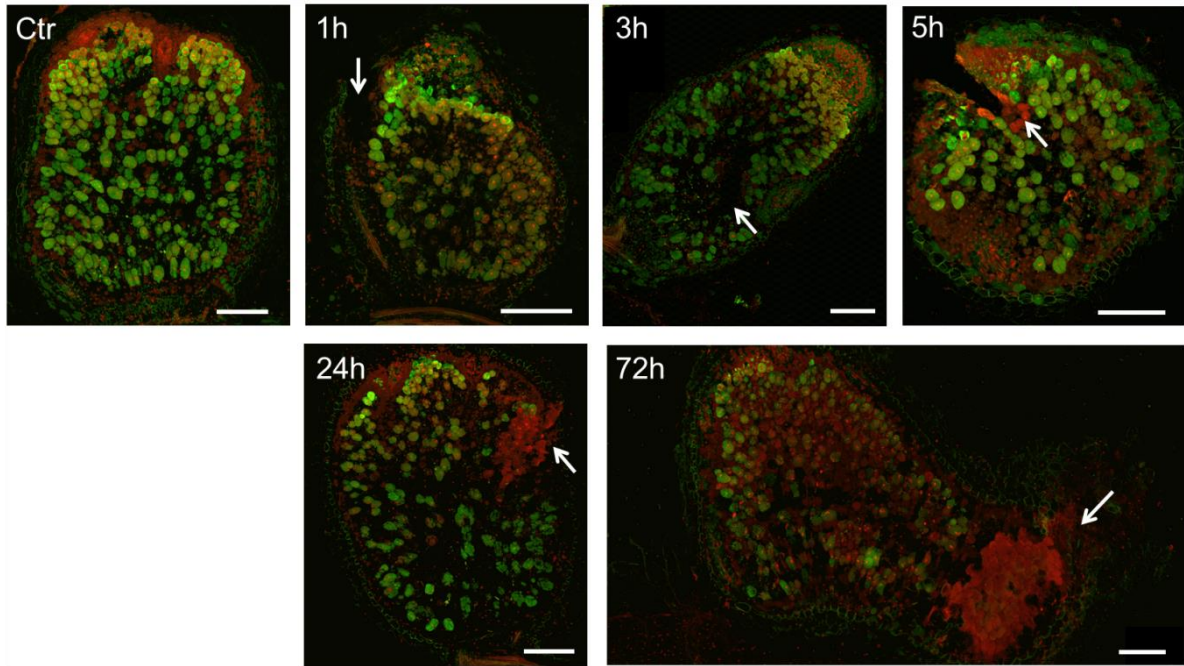

**Supplemental Figure S9. Live and dead staining of Medicago wild-type inoculated nodules attached to the roots.**

Live and dead staining of 21-dpi nodule sections obtained from the WT inoculated with *S. medicae* WSM419. The nodules tethered to roots were snipped and the nodulated plants were incubated 0 (Ctr), 1, 3, 5 24 and 72h. Scale bars = 250  $\mu$ m. The arrows show the snipped zone of the nodules. This figure shows the complete image panel corresponding to the experiment of the figure 5H.

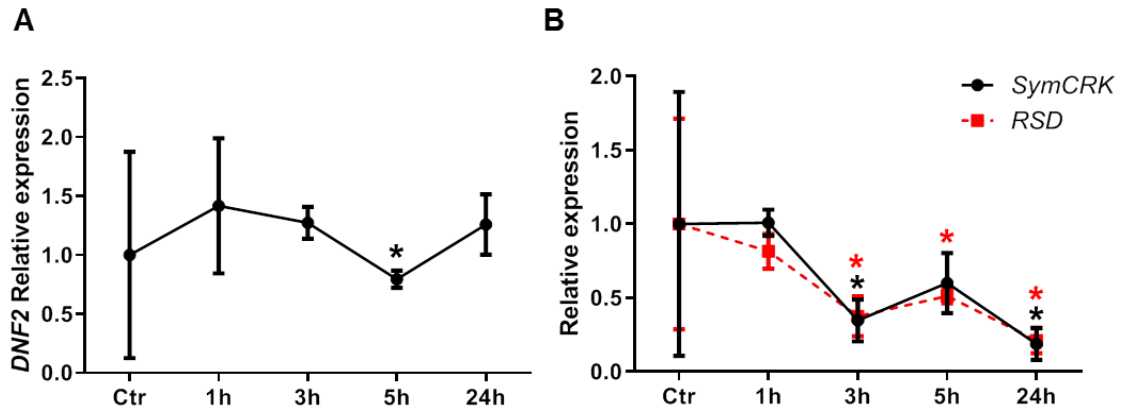

**Supplemental Figure S10. Expression pattern of *DNF2*, *SymCRK* and *RSD* in *Medicago* wild-type nodules in response to wounding.**

(A) *DNF2*, (B) *SymCRK*/*RSD* expression 0 (Ctr), 1, 3, 5 and 24h after wounding evaluated using RT-qPCR in 21-dpi WT nodules isolated from plants cultivated *in vitro* and inoculated with *S. medicae* WSM419. The results show mean expression of three independent experiments (16 plants per experiment) with two technical replicates. Error bars show SE and the asterisks represent significant variation using Mann & Whitney statistical test (p-value < 2.5%).

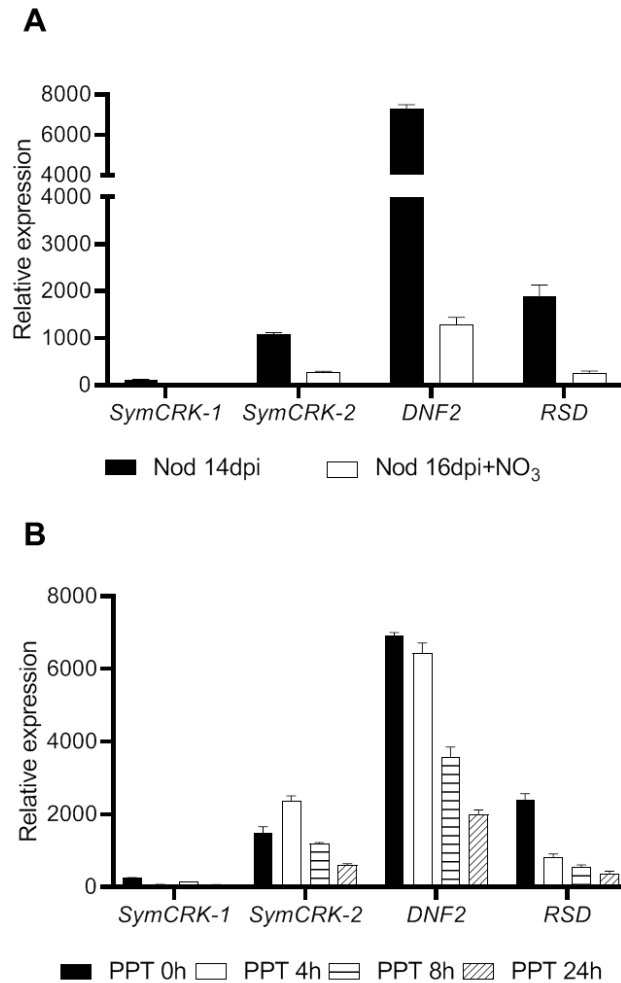

**Supplemental Figure S11. Expression pattern of *DNF2*, *SymCRK* and *RSD* in *Medicago* wild-type nodules in response to nitrate and phosphinothricin treatments.**

Expression patterns of *DNF2*, *SymCRK* and *RSD* in 16-dpi nodules treated or not with nitrate (A, Benedito et al., 2008) or from nodulated plants incubated 0, 4, 8 and 24 hours with the inhibitor of glutamine synthase, the phosphinothricin at [0.25 mM] (B, Seabra et al., 2012). Expression data are provided by the *MtGEA* database (<https://medicago.toulouse.inrae.fr/MtExpress>, Noble Research Institute, Benedito et al., 2008). Two probsets annotated *SymCRK-1*, *SymCRK-2* recognized *SymCRK* in the database. Relative expression corresponds to mean signal of cDNA hybridization on the microarray. Error bars show SE for three independent experiments.

**Supplemental Table S1.** List of *nf583*, *nf2210* and *nf2100* genes showing FSTs.

The genes with high confidence FST located in the ORFs were selected. For each mutant line, the tagged genes, the protein annotation, the probset ID on MtAffymV4 and the expression of the genes in the roots and the nodules of *M. truncatula*, are listed. FSTs and expression data are provided respectively by the Medicago *Tnt1* mutant database and Genevestigator. ND: not determined.

**FST NF2210**

| Data download from Genvestigator |                                                      | Number of samples                         | roots 242              | nodules 40              |
|----------------------------------|------------------------------------------------------|-------------------------------------------|------------------------|-------------------------|
| GENE ID Mt4.OV1                  | Protein annotation                                   | Probeset ID                               | Mean Expression roots  | Mean expression nodules |
| <b><u>Medtr6g086170</u></b>      | <b><u>SULFATE TRANSPORTER 3.5-RELATED</u></b>        | <b><u>Mtr.37708.1.S1_at</u></b>           | <b><u>15000.42</u></b> | <b><u>106081.77</u></b> |
| Medtr4g023030                    | AXI 1 PROTEIN-LIKE PROTEIN                           | Mtr.14950.1.S1_s_at/<br>Mtr.10701.1.S1_at | 14257.89               | 14615.44                |
| Medtr5g080390                    | PUMILIO HOMOLOG 1-RELATED                            | Mtr.49129.1.S1_s_at                       | 10683.95               | 13478.64                |
| Medtr5g081960                    | TRANSFERASE FAMILY (TRANSFERASE)                     | Mtr.34637.1.S1_at                         | 24149.3                | 12771                   |
| Medtr7g013100                    | DIHYDROLIPOAMIDE ACETYL/SUCCINYL-TRANSFERASE-RELATED | Mtr.48448.1.S1_at                         | 6924.38                | 4105.86                 |
| Medtr3g079310                    | BCDNA.GH11111                                        | Mtr.20789.1.S1_at/<br>Mtr.20787.1.S1_at   | 4200.64                | 3629.64                 |
| Medtr1g026910                    | ATP-DEPENDENT PROTEASE CEREBLON                      | Mtr.39899.1.S1_at                         | 6445.42                | 2737.87                 |
| Medtr1g099290                    | CHITINASE                                            | Mtr.5384.1.S1_at                          | 3473.9                 | 2621.77                 |
| Medtr1g098580                    | UNKOWN                                               | Mtr.15307.1.S1_at                         | 7399.5                 | 1810.58                 |
| Medtr4g066170                    | PROTEIN C13C4.8                                      | Mtr.37362.1.S1_at/<br>Msa.1690.1.S1_at    | 2439.52                | 1302.47                 |
| Medtr1g076720                    | PANTOTHENATE KINASE                                  | Mtr.6707.1.S1_s_at                        | 1441.21                | 655.64                  |
| Medtr3g080190                    | ENDOGLUCANASE 11                                     | ND                                        | 903.39                 | 594.58                  |
| Medtr3g071860                    | SNF2 DOMAIN-CONTAINING PROTEIN CLASSY 1-RELATED      | Mtr.21259.1.S1_at                         | 192.46                 | 234.85                  |
| Medtr2g008100                    | HISTIDINE DECARBOXYLASE / L-HISTIDINE CARBOXY-LYASE  | Mtr.22597.1.S1_s_at                       | 204.64                 | 198.11                  |
| Medtr1g021520                    | TRANSCRIPTION REPRESSOR KAN1-RELATED                 | ND                                        | ND                     | ND                      |
| Medtr1g021965                    | UNKOWN                                               | ND                                        | ND                     | ND                      |
| Medtr2g015660                    | UNKOWN                                               | ND                                        | ND                     | ND                      |
| Medtr3g031400                    | GLUCOSYL/GLUCURONOSYL TRANSFERASES                   | ND                                        | ND                     | ND                      |
| Medtr3g108080                    | EMBRYO DEFECTIVE 2410                                | ND                                        | ND                     | ND                      |

|               | PROTEIN                                                      |    |    |    |
|---------------|--------------------------------------------------------------|----|----|----|
| Medtr3g115650 | COILED-COIL DOMAIN-CONTAINING PROTEIN 115                    | ND | ND | ND |
| Medtr4g008600 | F-BOX/LEUCINE RICH REPEAT PROTEIN                            | ND | ND | ND |
| Medtr4g074200 | DNA REPAIR PROTEIN XRCC2 HOMOLOG                             | ND | ND | ND |
| Medtr5g034370 | PLANT PROTEIN OF UNKNOWN FUNCTION (DUF936) (DUF936)          | ND | ND | ND |
| Medtr5g064800 | F10B6.4                                                      | ND | ND | ND |
| Medtr5g094810 | XENOBIOTIC-TRANSPORTING ATPASE / STEROID-TRANSPORTING ATPASE | ND | ND | ND |
| Medtr6g035310 | UNKOWN                                                       | ND | ND | ND |
| Medtr6g075460 | CYCLIC NUCLEOTIDE-GATED ION CHANNEL 19-RELATED               | ND | ND | ND |
| Medtr6g078200 | GLUCAN ENDO-1,3-BETA-D-GLUCOSIDASE / LAMINARINASE            | ND | ND | ND |

### FST NF2210

| Data download from Genvestigator |                                                                      | Number of samples                 | roots 242                | nodules 40                |
|----------------------------------|----------------------------------------------------------------------|-----------------------------------|--------------------------|---------------------------|
| GENE ID Mt4.0V1                  | Protein annotation                                                   | Probeset ID                       | Mean Expression roots    | Mean expression nodules   |
| <a href="#">Medtr6g086170</a>    | <a href="#">SULFATE TRANSPORTER 3.5-RELATED</a>                      | <a href="#">Mtr.37708.1.S1_at</a> | <a href="#">15000.42</a> | <a href="#">106081.77</a> |
| Medtr4g050480                    | PROTEIN IQ-DOMAIN 15-RELATED                                         | Mtr.9374.1.S1_at                  | 34073.8                  | 23460.03                  |
| Medtr2g078730                    | D-AMINO-ACID TRANSAMINASE / D-ASPARTIC AMINOTRANSFERASE              | Mtr.37617.1.S1_at                 | 42933.99                 | 22789.97                  |
| Medtr2g097670                    | PUMILIO HOMOLOG 1-RELATED                                            | Mtr.41554.1.S1_at                 | 32940.93                 | 22371.37                  |
| Medtr3g074930                    | ACID PHOSPHATASE RELATED                                             | Mtr.37882.1.S1_at                 | 55444.41                 | 20026.37                  |
| Medtr7g029105                    | UNKOWN                                                               | Mtr.45095.1.S1_at                 | 4669.28                  | 4064.76                   |
| Medtr6g005390                    | CBIX (CBIX)                                                          | Mtr.5349.1.S1_s_at                | 4996.46                  | 2072.69                   |
| Medtr1g100627                    | ARM REPEAT SUPERFAMILY PROTEIN-RELATED                               | Mtr.11503.1.S1_at                 | 28521.97                 | 1712.62                   |
| Medtr5g019050                    | LYSM DOMAIN RECEPTOR-LIKE KINASE 4                                   | Mtr.15787.1.S1_at                 | 3488.11                  | 1449.09                   |
| Medtr8g018280                    | NB-ARC DOMAIN (NB-ARC) // LEUCINE RICH REPEAT                        | Mtr.46816.1.S1_at                 | 1938.7                   | 981.27                    |
| Medtr4g127420                    | CCT MOTIF (CCT) PROTEIN                                              | Mtr.13254.1.S1_at                 | 882.13                   | 783.93                    |
| Medtr5g096200                    | OLIGOPEPTIDE TRANSPORTER 1-RELATED                                   | Mtr.29264.1.S1_at                 | 694.87                   | 709.75                    |
| Medtr5g015170                    | SF7 - ACR1                                                           | Mtr.5494.1.S1_at                  | 428.1                    | 665.88                    |
| Medtr8g013610                    | G-TYPE LECTIN S-RECEPTOR-LIKE SERINE/THREONINE-PROTEIN KINASE SD1-13 | Mtr.50504.1.S1_at                 | 2181.7                   | 620.83                    |

|                             |                                                                                 |                                 |                      |                      |
|-----------------------------|---------------------------------------------------------------------------------|---------------------------------|----------------------|----------------------|
| Medtr1g069325               | KETOHEXOKINASE / HEPATIC FRUCTOKINASE                                           | Mtr.13302.1.S1_at               | 793.98               | 477.78               |
| Medtr4g130580               | UNKOWN                                                                          | Mtr.26057.1.S1_at               | 447.7                | 463.91               |
| Medtr5g016830               | FILAMENT-LIKE PLANT PROTEIN 7                                                   | Mtr.11295.1.S1_at               | 1768.18              | 431.89               |
| Medtr5g034180               | UNKOWN                                                                          | Mtr.2095.1.S1_at                | 451.99               | 401.15               |
| Medtr2g067440               | PEROXIDASE / LACTOPEROXIDASE                                                    | Mtr.32452.1.S1_at               | 353.79               | 289.18               |
| Medtr8g068050               | PROTEIN KINASE DOMAIN (PKINASE) // LEGUME LECTIN DOMAIN                         | Mtr.46816.1.S1_at               | 1652.28              | 272.83               |
| Medtr8g018450               | LINOLEATE 9S-LIPOXYGENASE / LINOLEATE 9-LIPOXYGENASE                            | Mtr.24264.1.S1_at               | 558.91               | 238.26               |
| Medtr4g102310               | CYTOCHROME P450 - LIKE PROTEIN-RELATED                                          | Mtr.38814.1.S1_at               | 5680.79              | 209.27               |
| Medtr3g114920               | HIGH MOBILITY GROUP B PROTEIN 10-RELATED                                        | Mtr.27853.1.S1_at               | 207.47               | 202.83               |
| Medtr5g020900               | UNKOWN                                                                          | Mtr.25509.1.S1_at               | 193.11               | 196.59               |
| <b><u>Medtr4g005270</u></b> | <b><u>BETA-AMYRIN SYNTHASE / 2,3-OXIDOSQUALENE BETA-AMYRIN CYCLASE</u></b>      | <b><u>Mtr.31948.1.S1_at</u></b> | <b><u>485.49</u></b> | <b><u>195.08</u></b> |
| Medtr8g093920               | NUCLEAR TRANSCRIPTION FACTOR Y SUBUNIT B-7                                      | Mtr.46490.1.S1_at               | 187.93               | 193.04               |
| Medtr1g017790               | UNKOWN                                                                          | ND                              | ND                   | ND                   |
| Medtr1g017795               | UNKOWN                                                                          | ND                              | ND                   | ND                   |
| Medtr1g036430               | OLYADENYLATE-BINDING PROTEIN (RRM SUPERFAMILY) // SPLICING FACTOR 3B, SUBUNIT 4 | ND                              | ND                   | ND                   |
| Medtr1g106975               | PUMILIO HOMOLOG 14-RELATED                                                      | ND                              | ND                   | ND                   |
| Medtr2g062310               | DOMAIN OF UNKNOWN FUNCTION (DUF966) (DUF966)                                    | ND                              | ND                   | ND                   |
| Medtr2g067360               | UNKOWN                                                                          | ND                              | ND                   | ND                   |
| Medtr2g067450               | PEROXIDASE / LACTOPEROXIDASE                                                    | ND                              | ND                   | ND                   |
| Medtr2g083030               | OXIDOREDUCTASE, 2OG-FE II OXYGENASE FAMILY                                      | ND                              | ND                   | ND                   |
| Medtr2g089755               | TRANSFERASE FAMILY (TRANSFERASE)                                                | ND                              | ND                   | ND                   |
| Medtr4g081490               | ORGANIC CATION/CARNITINE TRANSPORTER 4                                          | ND                              | ND                   | ND                   |
| Medtr4g087920               | STEROL REGULATORY ELEMENT-BINDING PROTEIN                                       | ND                              | ND                   | ND                   |
| Medtr4g104690               | CDP-GLYCEROL DIPHOSPHATASE / CDP-GLYCEROL PYROPHOSPHATASE                       | ND                              | ND                   | ND                   |
| Medtr5g076060               | UNCHARACTERIZED CONSERVED PROTEIN                                               | ND                              | ND                   | ND                   |
| Medtr5g083890               | F-BOX DOMAIN (F-BOX) // LEUCINE RICH REPEAT (LRR_2)                             | ND                              | ND                   | ND                   |
| Medtr6g015000               | UDP-GLUCOSE/GDP-MANNOSE DEHYDROGENASE FAMILY, NAD BINDING DOMAIN                | ND                              | ND                   | ND                   |

|               |                                                   |    |    |    |
|---------------|---------------------------------------------------|----|----|----|
| Medtr6g032965 | 3-KETOACYL-COA SYNTHASE 17-RELATED                | ND | ND | ND |
| Medtr6g043850 | SF16 - F14O23.23 PROTEIN                          | ND | ND | ND |
| Medtr6g061110 | GPI16 SUBUNIT, GPI TRANSAMIDASE COMPONENT (GPI16) | ND | ND | ND |
| Medtr6g065190 | PPR REPEAT (PPR) // PPR REPEAT (PPR_1)            | ND | ND | ND |
| Medtr6g082770 | UNKOWN                                            | ND | ND | ND |
| Medtr6g088240 | ELONGATION FACTOR TS                              | ND | ND | ND |
| Medtr7g066100 | F-BOX DOMAIN (F-BOX) // F-BOX ASSOCIATED (FBA_1)  | ND | ND | ND |
| Medtr7g073980 | BTB/POZ DOMAIN (BTB) // NPH3 FAMILY (NPH3)        | ND | ND | ND |
| Medtr8g006470 | DUO POLLEN 1                                      | ND | ND | ND |
| Medtr8g008550 | UNKOWN                                            | ND | ND | ND |
| Medtr8g042520 | PEPTIDE EXPORTER, ABC SUPERFAMILY                 | ND | ND | ND |

#### FST NF2100

| Data download from Genvestigator |                                                                                     | Number of samples                       | roots<br>242                 | nodules<br>40                  |
|----------------------------------|-------------------------------------------------------------------------------------|-----------------------------------------|------------------------------|--------------------------------|
| GENE ID Mt4.0V1                  | Protein annotation                                                                  | Probeset ID                             | Mean<br>Expressio<br>n roots | Mean<br>expressio<br>n nodules |
| Medtr7g050980                    | PECTINESTERASE-RELATED<br>PROTEIN-RELATED                                           | Mtr.8508.1.S1_at                        | 85331,41                     | 11474,21                       |
| Medtr4g005730                    | SERINE/THREONINE-PROTEIN<br>KINASE OSR1                                             | Mtr.31949.1.S1_at/<br>Mtr.28731.1.S1_at | 3003,75                      | 1124,01                        |
| Medtr3g014060                    | 14-3-3-Like Protein Gf14<br>Lambda                                                  | Mtr.15400.1.S1_at                       | 350,33                       | 302,48                         |
| <b><u>Medtr4g005270</u></b>      | <b><u>BETA-AMYRIN SYNTHASE /<br/>2,3-OXIDOSQUALENE BETA-<br/>AMYRIN CYCLASE</u></b> | <b><u>Mtr.31948.1.S1_at</u></b>         | <b><u>485,59</u></b>         | <b><u>195,08</u></b>           |
| Medtr5g021920                    | F-BOX DOMAIN (F-BOX)                                                                | ND                                      | ND                           | ND                             |

**Supplemental Table S2.** List of the identified *PR* genes in the *M. truncatula* genome.

Unclassified *PR* corresponds to PR without defined classes.

| V4 Medicago Genome ID | Probeset V4 affymetrix | Predicted domain                                | Classe |
|-----------------------|------------------------|-------------------------------------------------|--------|
| Medtr2g010670.1       | Mtr.34477.1.S1_at      | CAP, CYSTEINE-RICH SECRETORY PROTEIN, ANTIGEN 5 | PR1    |
| Medtr2g435490.1       | Mtr.31096.1.S1_at      | CAP, CYSTEINE-RICH SECRETORY PROTEIN, ANTIGEN 5 | PR1    |
| Medtr2g010600.1       | Mtr.8977.1.S1_at       | CAP, CYSTEINE-RICH SECRETORY PROTEIN, ANTIGEN 5 | PR1    |
| Medtr2g012370.1       | Mtr.8977.1.S1_at       | CAP, CYSTEINE-RICH SECRETORY PROTEIN, ANTIGEN 5 | PR1    |
| Medtr2g010650.1       | Msa.3171.1.S1_at       | CAP, CYSTEINE-RICH SECRETORY PROTEIN, ANTIGEN 5 | PR1    |
| Medtr5g018755.1       | Mtr.25125.1.S1_at      | CAP, CYSTEINE-RICH SECRETORY PROTEIN, ANTIGEN 5 | PR1    |
| Medtr8g078770.1       | Mtr.5901.1.S1_at       | CAP, CYSTEINE-RICH SECRETORY PROTEIN, ANTIGEN 5 | PR1    |
| Medtr5g018770.1       | Mtr.82.1.S1_at         | CAP, CYSTEINE-RICH SECRETORY PROTEIN, ANTIGEN 5 | PR1    |
| Medtr4g050762.1       | Mtr.8977.1.S1_at       | CAP, CYSTEINE-RICH SECRETORY PROTEIN, ANTIGEN 5 | PR1    |
| Medtr2g010610.1       | Mtr.8977.1.S1_at       | CAP, CYSTEINE-RICH SECRETORY PROTEIN, ANTIGEN 5 | PR1    |
| Medtr2g010630.1       | Mtr.8977.1.S1_at       | CAP, CYSTEINE-RICH SECRETORY PROTEIN, ANTIGEN 5 | PR1    |
| Medtr2g010690.1       | Mtr.34477.1.S1_at      | CAP, CYSTEINE-RICH SECRETORY PROTEIN, ANTIGEN 5 | PR1    |
| Medtr2g010700.1       | Mtr.34477.1.S1_at      | CAP, CYSTEINE-RICH SECRETORY PROTEIN, ANTIGEN 5 | PR1    |
| Medtr2g010640.1       | Mtr.34477.1.S1_at      | CAP, CYSTEINE-RICH SECRETORY PROTEIN, ANTIGEN 5 | PR1    |
| Medtr2g010590.1       | Msa.3171.1.S1_at       | CAP, CYSTEINE-RICH SECRETORY PROTEIN, ANTIGEN 5 | PR1    |
| Medtr5g018750.1       | Mtr.81.1.S1_at         | CAP, CYSTEINE-RICH SECRETORY PROTEIN, ANTIGEN 5 | PR1    |
| Medtr8g045490.1       | Mtr.10361.1.S1_at      | BET_V_1                                         | PR10   |
| Medtr8g045640.1       | Mtr.10363.1.S1_x_at    | BET_V_1                                         | PR10   |
| Medtr8g045400.1       | Mtr.10364.1.S1_at      | BET_V_1                                         | PR10   |
| Medtr4g120760.1       | Mtr.12615.1.S1_at      | BET_V1-LIKE                                     | PR10   |
| Medtr4g120970.1       | Mtr.34114.1.S1_s_at    | BET_V1-LIKE                                     | PR10   |
| Medtr6g033450.1       | Mtr.34114.1.S1_s_      | BET_V1-LIKE                                     | PR10   |



|                 |                                              |                               |      |
|-----------------|----------------------------------------------|-------------------------------|------|
|                 | at                                           |                               |      |
| Medtr1g030810.1 | Mtr.3416.1.S1_at                             | BET_V1-LIKE                   | PR10 |
| Medtr4g120950.1 | Mtr.37852.1.S1_at                            | BET_V1-LIKE                   | PR10 |
| Medtr8g045570.1 | Mtr.38110.1.S1_at                            | BET_V1-LIKE                   | PR10 |
| Medtr8g045665.1 | Mtr.40102.1.S1_at                            | BET_V1-LIKE                   | PR10 |
| Medtr8g045520.1 | Mtr.40106.1.S1_s_ at                         | BET_V1-LIKE                   | PR10 |
| Medtr3g055120.1 | Mtr.43078.1.S1_at/<br>Mtr.43078.1.S1_s_ at   | BET_V1-LIKE                   | PR10 |
| Medtr2g435310.1 | Mtr.12615.1.S1_at                            | BET_V1-LIKE                   | PR10 |
| Medtr8g045560.1 | Msa.1635.1.S1_at                             | BET_V1-LIKE                   | PR10 |
| Medtr4g120940   | Not determined                               | SRPBCC SUPER FAMILY           | PR10 |
| Medtr8g045555   | Mtr.40109.1.S1_at                            | SRPBCC SUPERFAMILY            | PR10 |
| Medtr1g031640   | Mtr.45999.1.S1_at                            | SRPBCC SUPERFAMILY            | PR10 |
| Medtr8g045555.1 | Mtr.40109.1.S1_at                            | BET_V1-LIKE                   | PR10 |
| Medtr8g045735.1 | Msa.1635.1.S1_at                             | BET_V1-LIKE                   | PR10 |
| Medtr8g045300.1 | Mtr.45935.1.S1_at                            | BET_V1-LIKE                   | PR10 |
| Medtr8g045695.1 | Msa.1635.1.S1_at                             | BET_V1-LIKE                   | PR10 |
| Medtr4g120940.1 | Mtr.34114.1.S1_s_ at                         | BET_V1-LIKE                   | PR10 |
| Medtr2g035220.1 | Mtr.10317.1.S1_at/<br>Msa.3122.1.S1_at       | BET_V1-LIKE                   | PR10 |
| Medtr2g035210.1 | Msa.3122.1.S1_at                             | BET_V1-LIKE                   | PR10 |
| Medtr2g035190.1 | Msa.3122.1.S1_at                             | BET_V1-LIKE                   | PR10 |
| Medtr2g035320.1 | Msa.3122.1.S1_at                             | BET_V1-LIKE                   | PR10 |
| Medtr2g035320.2 | Msa.3122.1.S1_at                             | BET_V1-LIKE                   | PR10 |
| Medtr1g030840.1 | Mtr.29236.1.S1_at                            | BET_V1-LIKE                   | PR10 |
| Medtr1g030820.1 | Mtr.36367.1.S1_at                            | BET_V1-LIKE                   | PR10 |
| Medtr2g035150.1 | Mtr.42966.1.S1_at                            | BET_V1-LIKE                   | PR10 |
| Medtr2g035120.1 | Mtr.42968.1.S1_at                            | BET_V1-LIKE                   | PR10 |
| Medtr2g035130.1 | Mtr.12277.1.S1_at                            | BET_V1-LIKE                   | PR10 |
| Medtr2g035100.1 | Mtr.40147.1.S1_s_ at/<br>Msa.2942.1.S1_s_ at | BET_V1-LIKE                   | PR10 |
| Medtr2g035105.1 | Mtr.40147.1.S1_s_ at                         | BET_V1-LIKE                   | PR10 |
| Medtr3g055130   | Mtr.6516.1.S1_at                             | BET_V1-LIKE                   | PR10 |
| Medtr2g034480   | Mtr.18650.1.S1_at/<br>Msa.1736.1.S1_at       | GLYCOSYL HYDROLASES FAMILY 17 | PR2  |
| Medtr2g034470.1 | Mtr.18649.1.S1_s_ at                         | GLYCOSYL HYDROLASES FAMILY 17 | PR2  |
| Medtr2g034440.1 | Mtr.18649.1.S1_s_ at                         | GLYCOSYL HYDROLASES FAMILY 17 | PR2  |

|                 |                                                  |                                                                             |     |
|-----------------|--------------------------------------------------|-----------------------------------------------------------------------------|-----|
| Medtr3g118390   | Mtr.331.1.S1_at                                  | GLYCO_HYDRO_19 (CHITINASE CLASSE I)+ CHITIN_BIND_1 (CHITINASE BINDING PROT) | PR3 |
| Medtr7g115220   | Mtr.42872.1.S1_at/<br>Mtr.12237.1.S1_at          | BARWIN+CHITIN_BIND_1                                                        | PR4 |
| Medtr5g022310.2 | Msa.1526.1.S1_at                                 | TLP-PA                                                                      | PR5 |
| Medtr5g022310.1 | Msa.1526.1.S1_at/<br>Mtr.17914.1.S1_at           | G64-TLP-SF                                                                  | PR5 |
| Medtr8g096900.1 | Mtr.10968.1.S1_at                                | G64-TLP-SF                                                                  | PR5 |
| Medtr8g088960.1 | Mtr.11885.1.S1_at                                | GH64-TLP-SF                                                                 | PR5 |
| Medtr8g075550.1 | Mtr.15054.1.S1_at                                | GH64-TLP-SF                                                                 | PR5 |
| Medtr3g114030.1 | Mtr.17199.1.S1_at/<br>Mtr.33394.1.S1_at          | GH64-TLP-SF                                                                 | PR5 |
| Medtr8g107140.1 | Mtr.17268.1.S1_at                                | TLP-PA                                                                      | PR5 |
| Medtr8g056820.1 | Mtr.19129.1.S1_at                                | GH64-TLP-SF                                                                 | PR5 |
| Medtr6g009480.1 | Mtr.19465.1.S1_at                                | TLP-PA                                                                      | PR5 |
| Medtr2g063160.1 | Mtr.19470.1.S1_at                                | GH64-TLP-SF                                                                 | PR5 |
| Medtr7g076360.1 | Mtr.26405.1.S1_at                                | GH64-TLP-SF                                                                 | PR5 |
| Medtr2g069660.1 | Mtr.26405.1.S1_at                                | TLP-PA                                                                      | PR5 |
| Medtr5g059200.1 | Mtr.28302.1.S1_at                                | TLP-PA                                                                      | PR5 |
| Medtr2g067980.1 | Mtr.29368.1.S1_at                                | TLP-PA                                                                      | PR5 |
| Medtr2g068030.1 | Mtr.32260.1.S1_at                                | GH64-TLP-SF                                                                 | PR5 |
| Medtr7g102380.1 | Mtr.33691.1.S1_at                                | TLP-PA                                                                      | PR5 |
| Medtr8g075510.1 | Mtr.35231.1.S1_at                                | GH64-TLP-SF                                                                 | PR5 |
| Medtr8g075510.2 | Mtr.35231.1.S1_at                                | TLP-PA                                                                      | PR5 |
| Medtr4g063630.1 | Mtr.37482.1.S1_at                                | TLP-PA                                                                      | PR5 |
| Medtr5g010640.1 | Mtr.40555.1.S1_at                                | GH64-TLP-SF                                                                 | PR5 |
| Medtr4g073730.1 | Mtr.42529.1.S1_at                                | GH64-TLP-SF                                                                 | PR5 |
| Medtr2g068655.1 | Mtr.42536.1.S1_at                                | GH64-TLP-SF                                                                 | PR5 |
| Medtr8g096920.1 | Mtr.42775.1.S1_at                                | TLP-P                                                                       | PR5 |
| Medtr5g010635.1 | Mtr.42989.1.S1_at                                | GH64-TLP-SF                                                                 | PR5 |
| Medtr4g073720.1 | Mtr.43370.1.S1_at                                | TLP-PA                                                                      | PR5 |
| Medtr7g062610.1 | Mtr.49138.1.S1_at                                | GH64-TLP-SF SUPER FAMILY                                                    | PR5 |
| Medtr1g062640.1 | Mtr.6757.1.S1_at                                 | GH64-TLP-SF SUPER FAMILY                                                    | PR5 |
| Medtr5g022350.2 | Mtr.7850.1.S1_s_at                               | TLP-PA                                                                      | PR5 |
| Medtr5g022350.1 | Mtr.7850.1.S1_s_at<br>/Mtr.9418.1.S1_s_at/<br>t/ | GH64-TLP-SF SUPER FAMILY                                                    | PR5 |
| Medtr8g096910.1 | Mtr.8763.1.S1_at                                 | TLP-P                                                                       | PR5 |
| Medtr1g025420.1 | Mtr.9391.1.S1_at                                 | GH64-TLP-SF SUPER FAMILY                                                    | PR5 |
| Medtr1g025420.2 | Mtr.9391.1.S1_at                                 | TLP-PA                                                                      | PR5 |
| Medtr1g021945.1 | Not determined                                   | GH64-TLP-SF SUPER FAMILY                                                    | PR5 |
| Medtr1g062390.1 | Not determined                                   | GH64-TLP-SF SUPER FAMILY                                                    | PR5 |
| Medtr2g063150.1 | Not determined                                   | GH64-TLP-SF SUPER FAMILY                                                    | PR5 |

|                                         |                                                             |                                                       |              |
|-----------------------------------------|-------------------------------------------------------------|-------------------------------------------------------|--------------|
| Medtr3g068015.1                         | Not determined                                              | GH64-TLP-SF SUPER FAMILY                              | PR5          |
| Medtr3g081550.1                         | Not determined                                              | GH64-TLP-SF SUPER FAMILY                              | PR5          |
| Medtr5g023850.1                         | Not determined                                              | GH64-TLP-SF SUPER FAMILY                              | PR5          |
| Medtr5g068670.1                         | Not determined                                              | GH64-TLP-SF SUPER FAMILY                              | PR5          |
| Medtr8g037890.1                         | Not determined                                              | GH64-TLP-SF SUPER FAMILY                              | PR5          |
| Medtr8g089020.1                         | Not determined                                              | GH64-TLP-SF SUPER FAMILY                              | PR5          |
| Medtr3g111620.1                         | Not determined                                              | TLP-PA                                                | PR5          |
| Medtr6g079580.1                         | Not determined                                              | TLP-PA                                                | PR5          |
| Medtr8g036215.1                         | Not determined                                              | TLP-PA                                                | PR5          |
| Medtr1g099310.1                         | Msa.1009.1.S1_at/<br>Msa.2848.1.S1_at/<br>Mtr.12525.1.S1_at | GH18_HEVAMINE_XIPI_CLASS_III+C<br>HITINASE CLASSE III | PR8          |
| Medtr2g076070.1<br>/Medtr2g076070.<br>2 | Mtr.1214.1.S1_at                                            | PUTATIVE NTF2-LIKE PROTEIN<br>SUPER FAMILY            | Unclassified |
| Medtr2g076010.1<br>/Medtr2g076010.<br>2 | Mtr.26632.1.S1_at/<br>Mtr.26632.1.S1_at                     | PUTATIVE NTF2-LIKE PROTEIN<br>SUPER FAMILY            | Unclassified |
| Medtr8g058350                           | Mtr.51369.1.S1_at                                           | PUTATIVE NTF2-LIKE PROTEIN<br>SUPER FAMILY            | Unclassified |
| Medtr8g058700                           | Not determined                                              | NOT DETERMINED                                        | Unclassified |
| Medtr2g038000                           | Mtr.15743.1.S1_at/<br>Mtr.51386.1.S1_at                     | PHD_PRHA_LIKE+HOX                                     | Unclassified |

**Supplemental Table S3.** List of *PR* genes validated by RT-qPCR for the study.

Melting curve corresponds to the temperature at which 50% of DNA is denatured. Only primers producing amplification product showing one melting curve were selected for the study. The efficiency corresponds to DNA polymerase efficiency. The primers producing an efficiency less than 80% or superior than 120% were avoided.

| Gene ID         | Melting curve (specificity) | efficiency =2 (+/- 0,2) | ID Affymetrix       | PR classes | PR annotation in the figures |
|-----------------|-----------------------------|-------------------------|---------------------|------------|------------------------------|
| Medtr1g099310.1 | Specific                    | Yes                     | Msa.1009.1.S1_at    | PR8        | PR8                          |
| Medtr2g076070.1 | Specific                    | Yes                     | Mtr.1214.1.S1_at    | Unkown     | PRuk.1                       |
| Medtr2g076010.2 | Specific                    | Yes                     | Mtr.26632.1.S1_at   | Unkown     | PRuk.2                       |
| Medtr2g076070.2 | Specific                    | Yes                     | Mtr.1214.1.S1_at    | Unkown     | PRuk.3                       |
| Medtr2g076010.1 | Specific                    | Yes                     | Mtr.26632.1.S1_at   | Unkown     | PRuk.4                       |
| Medtr2g068655.1 | Not detected                | Not detected            | Mtr.42536.1.S1_at   | PR5        | PR5.1                        |
| Medtr4g120950.1 | Specific                    | Yes                     | Mtr.37852.1.S1_at   | PR10       | PR10.1                       |
| Medtr4g120970.1 | Specific                    | Yes                     | Mtr.34114.1.S1_s_at | PR10       | PR10.2 ( <b>PR10</b> )       |
| Medtr5g010640.1 | Specific                    | Yes                     | Mtr.40555.1.S1_at   | PR5        | PR5.3                        |
| Medtr6g033450.1 | Specific                    | Yes                     | Mtr.34114.1.S1_s_at | PR10       | PR10.3 ( <b>PR10</b> )       |
| Medtr7g062610.1 | Non specific                | No                      | Mtr.49138.1.S1_at   | PR5        | PR5.4                        |
| Medtr8g096910.1 | Specific                    | Yes                     | Mtr.8763.1.S1_at    | PR5        | PR5.6                        |

**Supplemental Table S4.** Pearson correlation analysis of the *PRs*, *CPs* and *PRs* vs. *CPs* expression.

Expression data of Medicago response to perturbations were downloaded from Genevestigator database (<https://genevestigator.com/>) and Pearson correlation was calculated using Excel software.

| Pearson corr   | <i>CP5/CP4</i> | <i>CP3</i> | <i>CP2</i> | <i>PR5.6</i> | <i>PR10</i> | <i>PR5.3</i> | <i>PR8</i> |
|----------------|----------------|------------|------------|--------------|-------------|--------------|------------|
| <i>CP5/CP4</i> | 1.00           | 0.93       | 0.91       | -0.10        | -0.07       | -0.06        | -0.10      |
| <i>CP3</i>     | 0.93           | 1.00       | 0.97       | -0.08        | -0.08       | -0.07        | -0.10      |
| <i>CP2</i>     | 0.91           | 0.97       | 1.00       | -0.09        | -0.11       | -0.10        | -0.10      |
| <i>PR5.6</i>   | -0.10          | -0.08      | -0.09      | 1.00         | 0.54        | 0.64         | 0.41       |
| <i>PR10</i>    | -0.07          | -0.08      | -0.11      | 0.54         | 1.00        | 0.65         | 0.37       |
| <i>PR5.3</i>   | -0.06          | -0.07      | -0.10      | 0.64         | 0.65        | 1.00         | 0.58       |
| <i>PR8</i>     | -0.10          | -0.10      | -0.10      | 0.41         | 0.37        | 0.58         | 1.00       |

**Supplemental Table S5.** Co-expressed *PHYTOCYSTATIN* genes with the studied *PRs*.

*PHYTOCYSTATIN* co-expressed with one or multiple *PRs* were isolated using the Phytomine tools of the Phytozome database (<https://phytozome.jgi.doe.gov/phytomine/begin.do>). The table shows the two identified *PHYTOCYSTATINS* (*Medtr2g026040*; *PHYTOCYST5* and *Medtr5g088770*; *PHYTOCYST32*) and the corresponding Pearson correlation value.

|                                    | <i>PR5.3</i> | <i>PR5.6</i> | <i>PR10.2</i> | <i>PR10.3</i> | <i>PHYTOCYST32</i> |
|------------------------------------|--------------|--------------|---------------|---------------|--------------------|
| <i>Medtr2g026040 (PHYTOCYST5)</i>  | 0.909        | 0.85922      | 0.9168        | 0.97454       | 0.95816            |
| <i>Medtr5g088770 (PHYTOCYST32)</i> | 0.92549      | X            | X             | 0.93896       | X                  |

**Table S6.** List of primers used in this study.

|                              | Gene ID                | Gene Name                 | Primer L                   | Primer R                     | Tm                    | Ref                          |
|------------------------------|------------------------|---------------------------|----------------------------|------------------------------|-----------------------|------------------------------|
| RT-qPCR primers              | <i>Medtr4g107930</i>   | <i>CP3</i>                | AGTGGATGCCGCTGAAGG         | TCAATCACAGTTTGGCTCAAATTAC    | 60                    | Pérez Guerra JC et al., 2010 |
|                              | <i>Medtr4g079770</i>   | <i>CP4</i>                | TGGAAGCATCTTACCCTACTG      | ATATACATAAATCGCAAATCACATTC   | 60                    | Pérez Guerra JC et al., 2010 |
|                              | <i>Medtr5g022560</i>   | <i>CP2</i>                | CATCTTACCCTACTGCTTAAATGC   | AACTAGAAACCATGATGAATGTAGC    | 60                    | Pérez Guerra JC et al., 2010 |
|                              | <i>Medtr4g079470</i>   | <i>CP5</i>                | GTTGACGGAACCTGCACTGC       | CACCCCAATCAGTTCCTCCAT        | 60                    | In this study                |
|                              | <i>TC106667</i>        | <i>Actine</i>             | TGGCATCACTCAGTACCTTTCAACAG | ACCCAAAGCATCAAATAATAAGTCAACC | 60                    | Berrabah el al., 2015        |
|                              | <i>Medtr1g099310.1</i> | <i>PR8</i>                | CCTCAATGTCTTTCCCTGA        | TGGAGCAGCAGCATCATTAG         | 60                    | In this study                |
|                              | <i>Medtr2g076070.1</i> | <i>PR unkown (PRuk.1)</i> | ATGGGAGATGGAGCTGACAC       | GCAATTTTCAGGTGGTCCTGT        | 60                    | In this study                |
|                              | <i>Medtr2g076010.2</i> | <i>PR unkown (PRuk.2)</i> | GCAATTTTCAGGTGGTCCTGT      | GCAATTTTCAGGTGGTCCTGT        | 60                    | In this study                |
|                              | <i>Medtr2g076070.2</i> | <i>PR unkown (PRuk.3)</i> | GTTAATGGCAGGGAGGGATT       | GCAATTTTCAGGTGGTCCTGT        | 60                    | In this study                |
|                              | <i>Medtr2g076010.1</i> | <i>PR unkown (PRuk.4)</i> | CAAGATCCGGTTGCAAGATT       | GCAATTTTCAGGTGGTCCTGT        | 60                    | In this study                |
|                              | <i>Medtr4g120950.1</i> | <i>PR10.1</i>             | CACGATTCATCGAGAAAGCA       | GGGTTGGAACCAATTTGAAC         | 60                    | In this study                |
|                              | <i>Medtr4g120970.1</i> | <i>PR10</i>               | TTGAGGGAGGACAAACCTTG       | CCTCAATGGCCTTGAAAAGA         | 60                    | In this study                |
|                              | <i>Medtr6g033450.1</i> |                           |                            |                              |                       |                              |
|                              | <i>Medtr2g068655.1</i> | <i>PR5.1</i>              | GTTCAAGAGGGCTTGTCTCG       | GGGCAGGCCTTACAATTACA         | 60                    | In this study                |
|                              | <i>Medtr5g010640.1</i> | <i>PR5.3</i>              | GGCCATCATCATGAAAACAA       | GACCCAGATTCTTGCCTTA          | 60                    | In this study                |
|                              | <i>Medtr8g096910.1</i> | <i>PR5.6</i>              | TACACAAGCAGCAAGGTTTCG      | CTACCGGATACGCTGCAACT         | 60                    | In this study                |
|                              | <i>Medtr5g088770.1</i> | <i>PHYTOCYST32</i>        | GGCGGCTCTAGGTGGTAGTA       | ACACCTTTTGCTTCCACCA          | 60                    | In this study                |
|                              | <i>Medtr2g026040.1</i> | <i>PHYTOCYST5</i>         | AAGGATGCTCTTGTCTGGTGG      | CAACTTTCGAGCCAACACA          | 60                    | In this study                |
|                              | <i>Medtr3g079850</i>   | <i>SymCRK</i>             | GATTTCTGTGTTGAAGCTTGGCT    | ACATCAGAAGTGAAGTCTCTGCAA     | 60                    | Berrabah et al., 2014        |
|                              | <i>Medtr4g085800</i>   | <i>DNF2</i>               | AGGCAATGCGTTCAGAAGGCCT     | CGACACCGAAGTGAAGTATAGTCA     | 60                    | Bourcy et al., 2013          |
| <i>MtrunA17_Chr7g0239441</i> | <i>RSD</i>             | GAAAGATGGAATACACCCAAAACC  | AACCTTGACCTGGGTCGTCAGA     | 60                           | Sinharoy et al., 2013 |                              |
| Genotyping Primers           |                        | NF583F                    | ACTATTGTGTCAACCACACGTG     |                              | 65                    | In this study                |
|                              |                        | NF583R                    | GGCATTAGTTATGCCAAACTTGC    |                              | 65                    | In this study                |
|                              |                        | NF2210F                   | GCAAGTTTGGCATAACTAATGCC    |                              | 65                    | In this study                |
|                              |                        | NF2210R                   | GGCTTGGGATATTGGTTGATTC     |                              | 65                    | In this study                |
|                              |                        | LTR4F                     | TACCGTATCTCGGTGCTACA       |                              | 66                    | Ratet et al., 2010           |
|                              |                        | LTR6R                     | GCTACCAACCAACCAAGTCAA      |                              | 66                    | Ratet et al., 2010           |
